# Supplementary material
Source: publisher figshare collection journal article supplement (https://sage.figshare.com/ndownloader/files/12973991)
Supplement: Supplementary file 1 [file 12973991]

| <b>Variables</b>      | <b>Source/Information</b>                                                                                                                                  |
|-----------------------|------------------------------------------------------------------------------------------------------------------------------------------------------------|
| ccode1                | EUGene                                                                                                                                                     |
| ccode2                | EUGene                                                                                                                                                     |
| abbrev1               | EUGene                                                                                                                                                     |
| abbrev2               | EUGene                                                                                                                                                     |
| year                  | EUGene                                                                                                                                                     |
| cwmid                 | EUGene COW Militarized Dispute                                                                                                                             |
| PTRANSITION           | Power transition calculated using COW cinc scores power transition occurs within five years before or after this year<br>0= no transition<br>1= transition |
| PARITY                | PARITY cinc ratio .8-1.25 (weaker has 80% of power of stronger)<br>0= no parity<br>1=parity                                                                |
| CLAIM                 | Territorial satisfaction fromicow1.01<br>0=no claim<br>1=claim                                                                                             |
| war                   | WAR 0=no war; 1=war                                                                                                                                        |
| DYAD                  | Dyad number                                                                                                                                                |
| GDPPC5YR1             | GDP1 calculated from Gleditsch GDP data mean change in per capita income over five year period country 1                                                   |
| GDPPC5YR2             | GDP2 calculated from Gleditsch GDP data mean change in per capita income over five year period country 2                                                   |
| chgdppc1minuschpdppc2 | Difference in per capita income change country 1-country 2                                                                                                 |
| IDEALPOINT1           | Idealpoint 1 from Bailey Strezhneve Voeten                                                                                                                 |
| IDEALPOINT2           | Idealpoint 2 from Bailey Strezhneve Voeten                                                                                                                 |
| idealpointdistance    | IPTDIS from Bailey Strezhnev Voeten                                                                                                                        |
| DEMOCRACY             | calculated from PolityIv 2014 using 6 as cutoff for democracy<br>0= not a mutually democratic dyad<br>1= mutually democratic dyad                          |
| cwpceyrs              | EUGene                                                                                                                                                     |
| peaceyearssq          | COW peace years square root                                                                                                                                |
| peaceyearsrb          | COW peace years cube root                                                                                                                                  |
| cwkeynum              | EUGene                                                                                                                                                     |
| cwhostd               | EUGene                                                                                                                                                     |
| cwongo                | EUGene                                                                                                                                                     |
| realgdp1              | from Gleditsch GDP data                                                                                                                                    |
| realgdp2              | from Gleditsch GDP data                                                                                                                                    |
| rgdppc1               | from Gleditsch GDP data                                                                                                                                    |
| rgdppc2               | from Gleditsch GDP data                                                                                                                                    |
| CINCRATIO             | capability ratio cinc1 over cinc2 larger is cinc1                                                                                                          |
| majpow1               | EUGene                                                                                                                                                     |
| majpow2               | EUGene                                                                                                                                                     |

|              |        |
|--------------|--------|
| region1      | EUGene |
| region2      | EUGene |
| cwhost1      | EUGene |
| cwhost2      | EUGene |
| cwstyr1      | EUGene |
| cwstyr2      | EUGene |
| cap_1        | EUGene |
| cap_2        | EUGene |
| midwithforce | EUGene |
